# Supplementary material for: Nonlinear processes in tsunami simulations for the Peruvian coast with focus on Lima/Callao
Source: Copernicus journal article supplement (doi:10.5194/egusphere-2023-1365), 2023-06-30
Supplement: Supplementary file [file egusphere-2023-1365-AC2-supplement.pdf]

## **Replies to the reviewer's comments and suggestions.**

1. The introduction could be better formulated and widened for a broad spectrum of readers.

*If the reviewer does not object, we will try to divide the response to the first paragraph of comments into several subparagraphs to respond to suggestions and comments more thoroughly. Changes in the text of the article after editing are highlighted in red.*

The authors do not discuss how inhomogeneous coastal and geomorphological processes can affect tsunami run-up heights and arrival times estimation from simulations in the introduction. Note that although this is related to the first type of tsunami modeling (using the authors' own jargon), indeed, the Sumatra 2004 earthquake had a similar magnitude and demonstrated that complexities in large tsunamis are not well understood ([Arcas and Titov, 2006](#); [Broutman et al., 2014](#); [Rabinovich et al., 2017](#)), highlighting the need to understand better and estimate local bathymetry. Although nonlinear terms in the tsunami code is one of the signatures of this work, the authors also do not discuss the disturbance on tsunami signals by local bathymetry and coastal topography resonance, refraction, and nonlinearity ([Mofjeld, 2009](#)) concisely (only the reflection is discussed later at the end of the introduction).

*In the introduction, we have discussed the lack of information in tsunami wave modelling about bathymetry/topography and its effect on tsunami wave heights. At the same time, we would like to emphasise that in this study, we do not experience problems with a high-quality database of bathymetry and topography. The database used has a resolution of 300m for bathymetry and 12m for the dry zone (our mesh resolution in Tsunami-HySEA model).*

*And the task before us was not to assess the quality of the topography. A description of the database used is given in paragraph 3.2.*

*The effect of resonance and refraction is essential in studying tsunami waves. We have added a phrase to the introduction about the importance of this phenomenon (with reference). We hope that in the near future, we will try to return to this issue in our research using the example of the coast of Chile, which is the most interesting object for studying this process.*

It would be good to have a short discussion on the commonality of inhomogeneous effects affecting water wave hazards (Shuto, 1967; Tuck and Hwang, 1972; Pelinovsky and Mazova, 1992; Golinko et al., 2006; Tsai et al., 2013; Chugunov et al., 2020; Mendes et al., 2022; Mendes and Kasparian, 2022).

*Additional material has been added to the introduction.*

*“Megatsunamis, like the ones that occurred in the Indian Ocean in 2004 and after the Tohoku earthquake in 2011, are distinguished by their impacts over significant distances. Both of these massive tsunamis were recorded along the South American coasts \citep{Rabinovich2017}. As the tsunami flowed, waves suffered reflection from continents and from the abrupt changes in the bathymetry and coastal topography \citep{Arcas2006, Rabinovich2017} and were affected by various atmospheric processes \citep{Broutman2014}, which significantly distorted the original signal. As the tsunami waves approached the coast, they were modified considerably by the continental shelf and local topography. In addition to the factors influencing the propagation of a tsunami wave described above, it was also noted that tsunami resonance and associated fluctuations in shelf and bay modes could play a crucial role in amplifying tsunami waves \citep{aranguizetal2019}. All these processes*

*are highly nonlinear and can significantly depend on the quality of bathymetry and topography data e.g. \citep{Sepulveda2020}*”

Finally, both introduction and conclusions should mention that wave run-up, and by consequence flooding, is stochastic and assumes a statistical distribution over spatial domains regardless of the chosen deterministic numerical model, see for instance (Choi et al., 2002, 2006; Geist and Parsons, 2008).

*Recommended additions have been made to the introduction*

*“The theory of the run-up of long waves onto the shore is of considerable interest. This problem of various long symmetrical or antisymmetrical waves with the same steepness of the front and rear slopes of unbroken waves onto a flat slope is quite well developed from a mathematical point of view within the framework of the nonlinear theory of shallow water, allowing for an analytical solution \citep{Shuto1967, Tuck1972, Pelinovsky1992, masselpelinovsky2001, tintonini2005}. As a result, formulas for run-up height can be parameterized to include the height and length of the suitable wave and the distance to shore. The numerical results of such models are reasonably in agreement with laboratory experiments. At the same time, according to numerous observations of the 2004 tsunami, due to the transformation of the wave when moving along heterogeneous bathymetry, a strongly deformed wave with a noticeable steepness of the front slope approaches the shore. \cite{didenkulovaetal2006} work showed that a wave with an increased steepness of the front slope penetrates further onto the coast than a wave with a symmetrical profile.”*

*The authors are fully aware that only a probabilistic study can account for the uncertainties with regard to the source of any given tsunami event, and estimates of the resulting inundation process need to be studied in a probabilistic sense. In this study, however, we focus on the contributions of nonlinear terms and parameter settings of the shallow water equations and therefore, we fix the source and investigate the inundation as a highly*

*nonlinear but deterministic process. If there are more aspects the reviewer would like to address, please let us know.*

2. Although the authors do plot bathymetry charts, they do not give a sense of slope magnitudes. I recommend they to briefly describe in the text the mean slope magnitude and maximum as well. Not only water depth is relevant, but how fast this change take place as well, i.e. the slope (see references in the comment above).

*Thanks for the recommendation. We have included a figure showing the bathymetry gradient in the area's study and added some description in the text in the appendix.*

3. In section 5 the authors discuss nonlinearity. I believe it to be important to show how the three types of nonlinear forcings vary spatially so that a proper evaluation of their effect is compared with tsunami run-up and flooding characteristics. The authors are already similar to that for a sample time series and spatial distribution of the cumulative effect of the three nonlinear forcings or by omitting one of them, but a separate analysis of each is also called for. The present plots on the effects of omitting one of the nonlinear forcings analyze only the outcome, but not the nonlinear term itself varying spatially.

*In addition to the spatial influence of each nonlinearity term, an analysis of the contribution of one or another term is given. The conclusion of the article repeats the findings in sufficient detail. Thus, the text states that the effect of the absence of moment advection introduces the impact of a significant reduction in horizontal smoothing. In other words, moment advection for a highly inhomogeneous field in the flood zone acts as a factor stabilizing the solution. The absence of nonlinearity in the continuity equation introduces the effects of a sharp steepening of the front of the oncoming wave and its destruction upon reaching the coastline. This effect is especially evident in morphometric features in the coastal zone. Nonlinearity due to bottom friction is included in each calculation since this is*

*practically the only stabilizer of the numerical scheme. Without considering bottom friction, it is possible to carry out calculations only in a homogeneous (concerning the topography and bathymetry of the area) with a homogeneous wave.*

4. The quality of figures is pretty low and they are generally small. Provided there is no page limit, I would support larger figures with higher resolution whenever possible.

*Done.*

5. I see no reason for the context of appendix A to be detached from the text itself, I recommend bringing it back.

*We partially transferred the results concerning the study of nonlinearity (a table and figure showing the flood zone for our experiments) into the main part of the work. We still decided to leave the remaining results on comparing models in the appendix so as not to overload the main parts of the article.*

*We are grateful to the reviewer for his careful reading of the article, useful comments, and warm words of support for the results of the work.*

*Authors.*
